# Supplementary material
Source: Springer Nature journal article supplement (https://www.springermedizin.de/resource/supplementary/13020_2014_211_MOESM4_ESM.pdf/9641216)

**(A)**

MCF-7

Cont

DOX

PD

DOX + PD

PARP

 $\beta$ -actin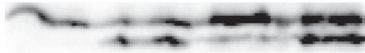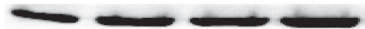**(B)**

MDA-MB-231

Cont

DOX

PD

DOX + PD

PARP

 $\beta$ -actin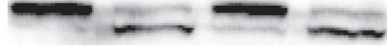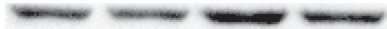

Supplement: MOESM4 [file 9641216]
